# Supplementary material
Source: PubMed Central journal article supplement (PMC4621614)
Supplement: mmc2.pdf [file mmc2.pdf]

## Article

# An Information-Based Approach to Change-Point Analysis with Applications to Biophysics and Cell Biology

Paul A. Wiggins<sup>1,\*</sup><sup>1</sup>Departments of Physics, Bioengineering and Microbiology, University of Washington, Seattle, Washington

**ABSTRACT** This article describes the application of a change-point algorithm to the analysis of stochastic signals in biological systems whose underlying state dynamics consist of transitions between discrete states. Applications of this analysis include molecular-motor stepping, fluorophore bleaching, electrophysiology, particle and cell tracking, detection of copy number variation by sequencing, tethered-particle motion, etc. We present a unified approach to the analysis of processes whose noise can be modeled by Gaussian, Wiener, or Ornstein-Uhlenbeck processes. To fit the model, we exploit explicit, closed-form algebraic expressions for maximum-likelihood estimators of model parameters and estimated information loss of the generalized noise model, which can be computed extremely efficiently. We implement change-point detection using the frequentist information criterion (which, to our knowledge, is a new information criterion). The frequentist information criterion specifies a single, information-based statistical test that is free from ad hoc parameters and requires no prior probability distribution. We demonstrate this information-based approach in the analysis of simulated and experimental tethered-particle-motion data.

## INTRODUCTION

The problem of determining the true state of a system that transitions between discrete states, and whose observables are corrupted by noise, is a canonical problem in statistics with a long history (e.g., Little and Jones (1)). The approach we discuss in this article is called “change-point analysis” and has been applied widely (1–5), including previous applications to single-molecule biophysics problems (6–10). We have recently developed an information-based approach to model selection, one that is new to our knowledge: the frequentist information criterion (FIC), an approach that greatly simplifies the analysis (C. H. LaMont and P. A. Wiggins, unpublished). This approach reconciles two previously disparate approaches (information-based versus frequentist), and fixes a series of flaws with previous applications (C. H. LaMont and P. A. Wiggins, unpublished).

From an information-theoretic perspective, model selection is performed by minimizing estimated information loss. FIC provides a single, objective statistical test for the existence of a change point that greatly simplifies the statistical analysis of change-point problems. A detailed development and description of this theory is too long to include here and is therefore described elsewhere (C. H. LaMont and P. A. Wiggins, unpublished). The primary goal of this article is to provide an explicit example of the application of this information-based approach to both simulated and experimental data to demonstrate the power of information-based inference in a biophysical context.

The article is organized as follows: we define an explicit noise model applicable to many biophysical systems and introduce the information criterion. We then present the application of these results to experimental tethered-particle-motion (TPM) data. The application of change-point analysis to simulated TPM data is presented in the [Supporting Material](#). The development of the theory, the computation of the FIC approximation of the complexity, and the applications of change-point analysis to other biophysical systems are discussed in C. H. LaMont and P. A. Wiggins (unpublished).

## MATERIALS AND METHODS

### A noise model for biophysical signals

We begin by making three broad assumptions about the character of the noise in a given state: 1) the probability distribution describing the noise is approximately Gaussian, 2) the noise is Markovian, and 3) the parameters describing the noise are stationary (time-independent). The Markovian property dictates that the probability distribution of the  $i$ th measurement depends only on the last measurement ( $i - 1$ ) and no other preceding measurements. (Note that we do not expect any of these conditions to be met exactly in a true experiment. These assumptions can and should be checked experimentally. We will give examples below of experimental data where we explicitly demonstrate that these assumptions are weakly and strongly violated.) When the three criteria listed above are met, the observations  $\vec{x}_i \in \mathbb{R}^D$  can be modeled by the discrete stochastic time-evolution equation, as

$$\vec{x}_i = \varepsilon(\vec{x}_{i-1} - \vec{\alpha}) + (1 - \varepsilon)[\vec{\mu} + \vec{\alpha}(i - i^*)] + k^{-1/2}\vec{\xi}_i, \quad (1)$$

where the stochastic processes are parameterized by the parameter vector  $\theta \equiv (k, \varepsilon, \vec{\mu}, \vec{\alpha})$ , and the  $\vec{\xi}_i$  values are independent  $D$ -dimensional, normally distributed random variables with zero mean and unit variance for each component of the vector. The parameter  $k$  is the stiffness, which

Submitted January 22, 2015, and accepted for publication May 28, 2015.

\*Correspondence: [pwiggins@uw.edu](mailto:pwiggins@uw.edu)

Editor: Fazoil Ataulakhov.

© 2015 by the Biophysical Society  
0006-3495/15/07/0346/9 \$2.00

<http://dx.doi.org/10.1016/j.bpj.2015.05.038>

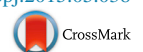

parameterizes the standard derivation of the noise;  $\varepsilon$  is the nearest-neighbor coupling and parameterizes the statistical correlation between the  $i$ th and the  $(i - 1)$ th observations;  $\mu$  is the level mean; and  $\alpha$  is the level slope in time. (Of course it is possible to give the level means a more complicated time dependence than a constant slope, but this form is sufficient to analyze many problems. Another important generalization is to make  $k$ - and  $\varepsilon$ -tensors. It is straightforward to extend the results for these generalized models.) Finally,  $i^*$  is a redundant parameter added for convenience and is analogous to putting the equation for a line in point-slope form. The role of these parameters in shaping the noise is illustrated schematically in Fig. 1. The noise parameters  $\theta$  would be called “emission parameters” in the context of a hidden Markov model (11).

Now we define a model for the signal corresponding to a system transitioning between a set of discrete states. We define the discrete time index corresponding to the start of the  $I$ th state as  $i_I$ . The model parameters describing the noise in the  $I$ th interval are  $\theta_I$ . Together these two sets of parameters ( $i_I$  and  $\theta_I$ ) parameterize the model  $\mathcal{M}$ . The model parameterization for the signal (including multiple states) can then be written explicitly as

$$\Theta = \begin{pmatrix} 1 & i_2 & \dots & i_n \\ \theta_1 & \theta_2 & \dots & \theta_n \end{pmatrix}, \quad (2)$$

where  $n$  is the number of states. By definition, we set  $i_1 \equiv 1$ . The dependence of the model on these two sets of parameters ( $\theta_I$  and  $i_I$ ) is fundamentally different. The noise model parameters  $\theta_I$  are continuous harmonic parameters. (Note that harmonic parameters have the property that the likelihood is well approximated by a Gaussian distribution about the maximum likelihood estimator (C. H. LaMont and P. A. Wiggins, unpublished) because they always have nonzero Fisher information (C. H. LaMont and P. A. Wiggins, unpublished).) By contrast, the change-point indices  $i_I$  are discrete and typically nonharmonic parameters. These properties will have important consequences for model selection (C. H. LaMont and P. A. Wiggins, unpublished).

## The model dimension

A critical consideration for analysis will be the dimension of the model. The most important dimension will be the dimension of an individual state. At this point, it is important to make the distinction between two types of model

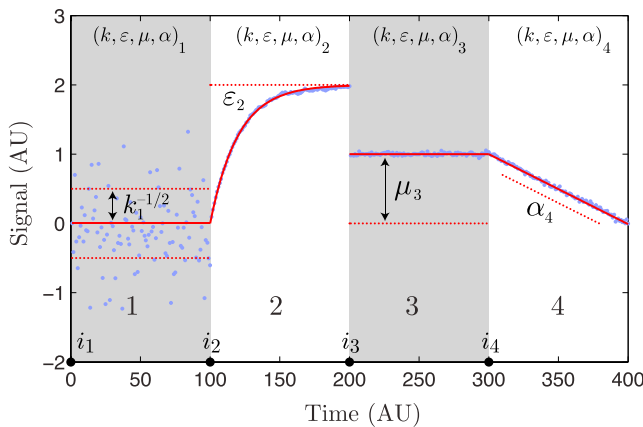

FIGURE 1 State model schematic. The state model signal is characterized by four model parameters that are written as the vector  $\theta \equiv (k, \varepsilon, \mu, \alpha)$ . Above, we schematically illustrate the role of each parameter in shaping the signal. The parameter  $k$ , state 1, parameterizes the standard deviation of the noise ( $\sigma = k^{-1/2}$ ). State 2 illustrates the effect of the finite lifetime of fluctuations in models with autoregression ( $0 < \varepsilon < 1$ ). State 3 illustrates the role of the level mean  $\mu$ . State 4 illustrates the role of the level slope ( $\alpha$ ). To see this figure in color, go online.

parameters, i.e., local and global. For instance, if we set  $\theta_I \equiv (k_I, \varepsilon_0, \bar{\mu}_I, \bar{\alpha}_0)$ , we will model a system with global parameter values (global is state-independent) of  $\varepsilon$  and  $\bar{\alpha}$ , and local parameter values (local is state-dependent) of  $k$  and  $\bar{\mu}$ . In spatial dimension  $D$ , the parameters  $k$  and  $\varepsilon$  have dimension 1 because they are scalars, whereas  $\bar{\mu}_I$  and  $\bar{\alpha}_0$  both have dimension  $D$  because they are vectors. In this example, the dimension of the model for an individual state is  $d = \dim k + \dim \bar{\mu} = 1 + D$ , where  $d$  is identical for all states (if there is only a single state, there is no distinction between local and global parameters, i.e.,  $d = d_M$ , as defined below), and therefore does not need a subscript  $I$ . Due to their discrete nature, the change-point indices do not contribute to the parameter counting for the model dimension. (The failure of the change-point indices to contribute to the model dimension is not universally true under all scenarios. For long-lived states with very small changes in the model parameters, the change-point index does become effectively continuous, which will therefore contribute to the state dimension (C. H. LaMont and P. A. Wiggins, unpublished).)

## The likelihood and information

The likelihood of model  $\mathcal{M}$ , with parameterization  $\Theta$  given observations  $X$ , is defined to be the probability density of observing  $X$  in the model  $\mathcal{M}$  parameterized by  $\Theta$ , as

$$L(\Theta, \mathcal{M}|X) \equiv Q(X|\Theta, \mathcal{M}), \quad (3)$$

where  $X$  is short-hand notation for the ordered list of observations  $X = (\vec{x}_i)_{i=1..N}$ .  $Q$  is the probability density of observations  $X$ , and  $\mathcal{M}$  is the model parameterized by parameters  $\Theta$ . (We give explicit analytic formulas for  $Q$  in the Supporting Material.) It is most convenient to work in terms of the encoding information, defined as the minus-log likelihood,

$$h(\Theta, \mathcal{M}|X) \equiv -\log L(\Theta, \mathcal{M}|X), \quad (4)$$

which can be interpreted as the information required (see C. H. LaMont and P. A. Wiggins, unpublished, for a more in-depth explanation of this statement), in natural units of information (Nats), to encode the observations  $X$  given a model  $\mathcal{M}$  parameterized by  $\Theta$ . Model predictivity is measured most naturally by the Shannon cross entropy for  $N$  observations,

$$H(\Theta, \mathcal{M}) \equiv \mathbb{E}_X h(\Theta, \mathcal{M}|X), \quad (5)$$

where  $\mathbb{E}_X$  is the expectation over observations  $X$  taken with respect to the true probability distribution of the observed stochastic process (C. H. LaMont and P. A. Wiggins, unpublished).

The information and entropy are understood in this context as follows: the information is understood as the number of characters (information) required to encode a particular observed data-set  $X$  using the model to some specified precision. If the model is perfectly predictive, no additional information is required to encode the observations  $X$ . The average amount of information to encode  $N$  observations is the entropy (e.g., see C. H. LaMont and P. A. Wiggins, unpublished). Naturally, the information  $h$  is said to be an estimator of entropy  $H$ .

## Model fitting by maximum likelihood

To fit the model, we use a maximum-likelihood procedure. The maximum-likelihood procedure selects the model parameters that maximizes the likelihood (and equivalently minimizes the information) with respect to the model parameters,

$$\hat{h}(\mathcal{M}, X) \equiv \min_{\Theta} h(\Theta, \mathcal{M}|X), \quad (6)$$

$$\hat{\Theta}_X \equiv \arg \min_{\Theta} h(\Theta, \mathcal{M}|X), \quad (7)$$

where the hat on the parameters denotes that they are the maximum likelihood estimators (MLEs) of the information and model parameters. We can divide the optimization processes for change-point analysis into two coupled steps: 1) determining the model noise parameters ( $\theta_i$ ) given a set of change-point indices ( $i_i$ ), and 2) determining the change-point indices themselves. The first step is computationally trivial: we derive explicit algebraic equations for the MLEs of the continuous parameters, which are convex given any set of change-point indices  $i_i$ . (See the [Supporting Material](#) for the explicit expressions.) This operation is order  $N$  computationally.

In contrast, the optimization of the change-point indices themselves is non-convex and must be performed numerically. A simultaneous optimization of  $n + 1$  states would require the computation of roughly  $N^n/n!$  sets of MLE parameters. To simplify the optimization problem, we use a greedy binary-segmentation algorithm that is applied recursively to each segment, subdividing segments until the model selection criterion is satisfied. This procedure is generically referred to as “model nesting”. The algorithm is described in [Box 1](#). The nesting procedure of optimizing with respect to the position of a single change-point index only requires the computation of order  $N$  MLEs. Because the MLE parameters can be computed algebraically, the greedy optimization process is computationally trivial and extremely rapid.

## Model selection and the information criterion

One might hope to estimate the size of the model, corresponding to the number of states  $n$ , using the ML procedure, but this procedure is flawed in the following sense: additional parameters always increase the likelihood due to overfitting. The solution we advocate can intuitively be understood as maximum predictivity (C. H. LaMont and P. A. Wiggins, unpublished). In maximum predictivity, one does not optimize the likelihood of observing the data-set fit in the ML procedure, but rather the probability of unobserved data generated by the same stochastic process. This modified procedure can be understood as minimizing an information criterion, an approximation for the unbiased estimator of the entropy (12). The canonical information criterion is called the “Akaike information criterion” (AIC) (12,13). It has long been appreciated that AIC fails to correctly estimate the bias in the

context of change-point analysis. We recently demonstrated that this failure is due to the presence of unidentifiable parameters (e.g., Watanabe (14)).

We have proposed an information criterion, the FIC, which accounts for parameter unidentifiability (C. H. LaMont and P. A. Wiggins, unpublished). FIC is defined as

$$\text{FIC}(X, \mathcal{M}) = h(\widehat{\Theta}_X, \mathcal{M}|X) + \mathcal{K}(\widehat{\Theta}_X, \mathcal{M}), \quad (11)$$

where  $\mathcal{K}$  is intuitively understood as a complexity function that penalizes the addition of new parameters but is rigorously defined as the bias in the estimator of the cross entropy. (Note that this complexity is analogous to the AIC complexity, but the FIC complexity is evaluated using an approximation that is more generally applicable, including in the context of singular models.)

The power of the information-based approach is as follows: naïvely, one might expect to have to compute the complexity for the entire range of possible parameter values (e.g., Kerssemakers et al. (8)). This is not the case for change-point analysis. Surprisingly, the complexity  $\mathcal{K}$  has a generic asymptotic form that depends only on the number of observations and the dimension of the model, greatly simplifying the analysis. This change-point complexity can be estimated analytically or computed numerically via Monte Carlo (C. H. LaMont and P. A. Wiggins, unpublished). The analytic limit can be related to the extrema of discrete-time Brownian bridges in  $d$  dimensions (C. H. LaMont and P. A. Wiggins, unpublished).

The optimal model, which maximizes the expected model predictivity, is the model that minimizes FIC:

$$\widehat{\mathcal{M}}(X) \equiv \arg \min_{\mathcal{M}} \text{FIC}(X, \mathcal{M}). \quad (12)$$

Again, the power of the information-based approach is clear: the comparison of the information criterion (FIC value) can be made between any two models (as long as FIC is computed with respect to the same data-set  $X$ ), regardless of differences in the model parameterization or the number of model parameters (12). The numerical minimization of FIC using the algorithm described above is effectively instantaneous, facilitating the exploration of many possible model realizations with minimal effort, as we will demonstrate below.

## RESULTS

### Change-point analysis applied to tethered particle motion

In this section, we apply the change-point algorithm to a biological problem. In the interest of brevity, we will consider the analysis of one specific example: experimental tethered-particle-motion (TPM) data in the main text. We analyze TPM data because it provides a rich signal, which incorporates three of the four parameters that we have introduced into our state model, while remaining an in vitro experiment. To demonstrate the breadth of applicability of the change-point algorithm, we present the analysis of three other problems (single-molecule-bleaching analysis, molecular-motor-stepping analysis, and the analysis of cell motility) in C. H. LaMont and P. A. Wiggins (unpublished).

Finzi and Gelles (15) developed the TPM experiment to observe DNA looping with single-molecule resolution. In the assay, beads are immobilized to a coverslip using DNA tethers a few kilobytes in length. The DNA tether behaves like a spring, confining the motion of the bead that

#### BOX 1 Greedy Binary-Segmentation Algorithm

- 1) Initialize the change-point vector:  $i \leftarrow \{1\}$
- 2) Segment model  $\widehat{\mathcal{M}}(i)$ 
  - a) Compute the entropy change that results from all possible new change-point indices  $j$ :

$$\Delta h_j \leftarrow \widehat{h}(\{i_1, \dots, j, \dots, i_n\}|X) - \widehat{h}(i|X). \quad (8)$$

- b) Find the minimum entropy change  $\Delta h_{\min}$ , and the corresponding index  $j_{\min}$ .
- c) **If** the entropy change plus the nesting complexity is  $< 0$ :

$$\Delta h_{\min} + k_- < 0, \quad (9)$$

**Then** accept the change point  $j_{\min}$ .

- i) Add the new change point to the change-point vector:

$$i \leftarrow \{i_1, \dots, j_{\min}, \dots, i_n\}. \quad (10)$$

- ii) Segment model  $\widehat{\mathcal{M}}(i)$

- d) **Else** terminate the segmentation process.

A schematic description of the greedy algorithm for determining change-point indices. The nesting complexity is defined as the difference in the complexity on model nesting:  $k_- \equiv K_{n+1} - K_n$ . In the expressions above, the information estimator  $\widehat{h}$  is evaluated at the respective MLE parameters  $\widehat{\theta}$  given the change-point indices  $i$ .

undergoes the tethered Brownian motion. The longer the DNA tether is, the larger the typical Brownian excursions of the bead from its average position. Protein-induced DNA looping reduces the effective length of the tether and therefore changes the character of the bead motion. The effective tether length is inferred by the analysis of the bead trajectory. The configuration (looped versus un-

looped) is then inferred from the effective DNA tether length. See the schematic in Fig. 2 B.

### Application to simulated data

In the Supporting Material, we model simulated data to demonstrate the performance of the technique because we

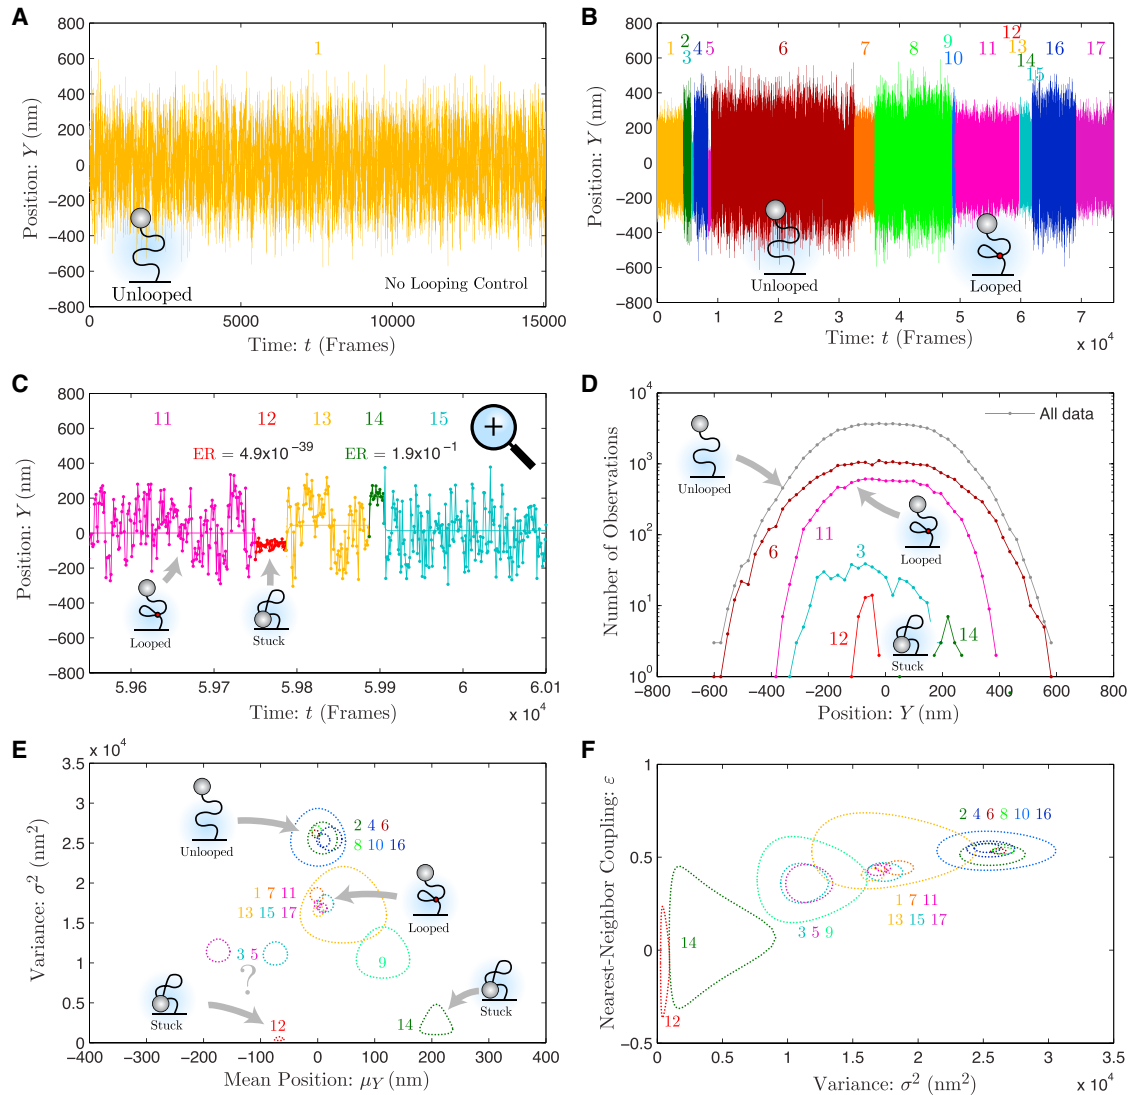

**FIGURE 2** Analysis of experimental TPM data: protein-induced DNA looping measured by TPM. (A) Position trace for the no-looping control. The  $y$  position of the bead shown for  $1.5 \times 10^4$  frames. In the absence of protein-induced looping, only a single state is identified by change-point analysis, corresponding to the unlooped configuration. (B) Position trace for protein-induced DNA looping. The  $y$  position of the bead shown for  $7.5 \times 10^4$  frames. Seventeen states were identified by change-point analysis. The trace is colored by state and the state number is shown above the trace. A representative example of the unlooped and looped state is shown. (C) High-resolution time trace. At  $t \approx 5.98 \times 10^4$  frames, a high-time-resolution trace is shown, which reveals two short-lived states, states 12 and 14. The ER for each of these states is shown. The statistical evidence for state 12 is extremely strong whereas the evidence for state 14 is marginal. (D) Histogram of bead position by state. The histogram for all data and selected states is shown. States 6 and 11 are representative of the unlooped and looped states, respectively. Neither state is well approximated by a Gaussian distribution, as demonstrated by the flatness of the peak of the probability density functions. (E) Mean position and variance by state. The 95% confidence region is shown for each state. The states cluster into two clearly identifiable groups corresponding to the unlooped (2, 4, 6, 8, 10, and 16) and looped (1, 7, 11, 13, 15, and 17) states. In addition to these clusters, there are low-mobility and moderate-mobility states with mean positions offset from zero. The short-lived states with low mobility correspond to sticking events (12 and 14). (F) Variance and nearest-neighbor coupling by state. The 95% confidence region is shown for each state. Again, the states form clusters analogous to (E). For states 12 and 14,  $\epsilon$  is approximately zero, consistent with bead sticking. To see this figure in color, go online.

can check the fit model against the true simulated model. Not only is the truth known, but the true model is one of the candidate models. In short, the analysis demonstrates that: 1) The change-point algorithm analysis of simulated data accurately estimates the change-point index positions. 2) The change-point algorithm analysis of simulated data accurately estimates the noise model parameters in each state. 3) The information criterion correctly identifies which parameters are global (equal for all states) versus local (at least one distinct value among the states) in our simulated model. 4) FIC predicts that the most predictive model is a model in which all the states can be identified or clustered into two sets of states with identical parameters corresponding to the looped and unlooped states, exactly as simulated. A detailed description of these simulations is presented in the [Supporting Material](#).

### Application to experimental data

It is important to note that the existence of a true model exactly equal to one of the candidate models is an unrealistic convenience of simulated data. In practice, experimental data is always extremely complex and TPM data is no exception. Therefore, the application of change-point analysis to experimental data is a more important and an interesting test of the techniques discussed in this article.

We apply the change-point analysis to experimental data from the lab of D. Dunlap (Emory University, Atlanta, GA). The data captures the DNA looping dynamics of the *lac* repressor (LacI) with a 2231-bp DNA construct and a 320-nm-diameter bead. On loop formation, the loop size is 1200 bp and residual DNA tether length is 1031 bp. We show two data sets in [Fig. 2](#): in [Fig. 2 A](#), we show the  $y$ -position trace for the no-protein control for  $1.5 \times 10^4$  frames. In [Fig. 2 B](#), we show the  $y$ -position trace for the protein-induced DNA looping for  $7.5 \times 10^4$  frames. The frame delay in both data sets is 20 ms.

As a first step in the data analysis, we need to determine which family of nested change-point models to analyze. We set the level slope  $\alpha = 0$  by hand. Now, we need to determine whether to fit the remaining parameters ( $k$ ,  $\varepsilon$ , and  $\mu$ ) as local (L) or global (G) parameters. We perform change-point analysis for each possibility: in each case, we minimize FIC for the family of nested models to find the optimal model in the model family. We use an ordered triplet of L and G parameters to label a model family to denote whether the parameter vector ( $k$ ,  $\varepsilon$ , and  $\mu$ ) is described by local or global parameters in the state model. For instance, LGL describes a model with local values of  $k$  and  $\mu$ , but a global value for  $\varepsilon$ . Note that the relation between the discrete time parameters ( $k$ ,  $\varepsilon$ , and  $\mu$ ) and the underlying physical parameters is discussed in the [Supporting Material](#).

Once the family optimum model has been determined, we record the FIC value for this model, which is the unbiased estimate of information loss. We also consider a model

that is constrained to be a Gaussian process ( $\varepsilon = 0$ ) rather than Ornstein-Uhlenbeck, with a global mean (model LOG) because this was essentially the model employed by Manzo and Finzi (10). A summary of the analysis of the simulated data is shown in [Table 1](#). The FIC values have a large constant offset and therefore only the FIC values relative to the minimum FIC value ( $\Delta\text{FIC}$ ) are shown in the table. The model with the lowest FIC is the model with the strongest statistical support. The relative difference between the FIC values for each model encodes the relative strength of the statistical support for the model (remember that because this is a likelihood-based measure, the absolute scale of the likelihood has no meaning, and therefore it cannot be understood as a statistical test of the model).

Our initial expectation (as simulated) was that both the mean bead position  $\bar{\mu}$  and the stiffness  $k$ , which parameterize the diffusion coefficient at high time resolution, would be global parameters while  $\varepsilon$ , which is controlled by the tether length, would be a local parameter. To our surprise, only models with local parameters for  $k$ ,  $\varepsilon$ , and  $\bar{\mu}$  (LLL) resulted in acceptable information criterion, despite incurring a larger complexity for adding states for all local parameters. The large information criterion for all models except the LLL model imply that at least some of the states violate our assumption that the diffusion constant and mean bead positions are constant throughout the experiment. We will examine both the experimental data and the LLL model in detail to understand this failure. The LOG model (similar to that employed by Manzo and Finzi (10)) leads to the largest information loss of the models considered. Despite the poor fit, it does identify all sufficiently long-lived states, but misses short-lived states and leads to oversegmentation due to a failure to correctly model the correlation between successive bead positions. This model also does not identify

**TABLE 1 Model selection for experimental TPM data**

| Model $M(k, \varepsilon, \mu)$ | Information Criterion<br>$\Delta\text{FIC}$ (Nats) | Number of<br>States $n$ | Parameters<br>per State $d$ |
|--------------------------------|----------------------------------------------------|-------------------------|-----------------------------|
| LOG                            | 22,920                                             | 11                      | 1                           |
| GLG                            | 1977                                               | 7                       | 1                           |
| GGL                            | 1975                                               | 7                       | 1                           |
| GLL                            | 1833                                               | 9                       | 3                           |
| LGG                            | 691                                                | 13                      | 1                           |
| LGL                            | 364                                                | 15                      | 3                           |
| LLG                            | 355                                                | 13                      | 2                           |
| LLL, clustered                 | 35                                                 | 17                      | 4                           |
| LLL                            | 0                                                  | 17                      | 4                           |

We considered eight families of models where the parameters  $k$ ,  $\varepsilon$ , and  $\mu$  were either optimized locally for each state (L) or globally for all states (G). For each family of models, the FIC value for the optimal model is shown. The large FIC values for all but the all-local model (LLL) offer strong statistical support for changes in all model parameters between states. Unlike the simulated data, the parameters describing the states corresponding to the looped and unlooped configurations are statistically distinct because the IC value for the clustered model is larger than the value for the LLL model.

bead-sticking events, which typically have a mean position offset. (Note that in this data set, the lifetime of the fluctuations, as parameterized by  $\epsilon$ , is sufficiently short as to not result in the identification of many false-positive states. If the frame rate was significantly increased or a larger bead was used at the same frame rate, the oversegmentation described for the simulated data would occur in the experimental data.)

The data and the LLL model are shown in Fig. 2. Fig. 2 A shows the analysis of the no-protein control, where the bead should only be found in the unlooped configuration. This control is critical in the context of the experimental data to demonstrate that the change-point analysis does not identify nonexistent states. Because the true distribution was known for the simulated data, this control was not required in the analysis of the simulated data. As expected, no change points were detected in the no-protein control, consistent with the algorithm successfully rejecting false-positive states.

Fig. 2 B shows the y-position trace for protein-induced DNA looping. Although this data may qualitatively appear similar to the simulated data, it is significantly more complex: 17 states were determined by change-point analysis and the trace is colored by state with the corresponding state number plotted above the trace. The characteristics of the 17 states are varied not only in the state parameters but in the state lifetimes.

Fig. 2 C shows a high time-resolution y-position trace in which two short-lived states were identified (states 12 and 14). One immediate concern is whether these states are the result of stochastic fluctuations rather than true transitions. We apply simple statistical metric to answer this question: the evidence ratio (ER) (12), which is described in the Supporting Material. In short, the ER is the ratio of the model likelihood in the absence of the state over the model likelihood in the presence of the state corrected for bias; therefore, a small ER for a state corresponds to strong statistical support. The ER values for each state are plotted in Fig. 2 C. State 12 shows extremely strong statistical support whereas the support for state 14 is much weaker. We shall discuss the physical significance of these states in more detail shortly.

Fig. 2 D shows the y-position histograms for all data and selected states. States 6 and 11 are representative of the unlooped and looped states, respectively. Compared with the histogram of the simulated data, it is immediately clear that the experimental probability distributions are too flat to be Gaussian probability distributions. This is an explicit example of the added complexity of the analysis of experimental data. We show the histograms for three other states (3, 12, and 14), two of which we have already discussed. All three of these states show a significant offset from the mean position of the majority of the data ( $\mu_y \approx 0$  nm). Although states 12 and 14 show low mobility, state 3 shows an intermediate mobility between state 12 and the looped states.

Fig. 2, E and F, shows the model parameters plotted by state. The dotted lines represent 95% confidence regions computed with respect to the model parameters ( $k$ ,  $\epsilon$ , and  $\mu$ ). As modeled in the simulated data, there are two well-defined clusters of states corresponding to the unlooped {2, 4, 6, 8, 10, 16} and looped {1, 7, 11, 13, 15, 17} states, but there appears to be at least one additional loose cluster. States 12 and 14 are clearly consistent with bead-sticking events: 1) The variance ( $k^{-1}$ ) for both states is small. 2) The mean position is offset from zero. 3) The nearest-neighbor coupling is consistent with zero (remember that in the limit where the relaxation time of the bead position is shorter than the frame delay,  $\epsilon$  goes to zero, whereas in the limit that the relaxation time is infinite, the motion is diffusion-dominated and  $\epsilon$  goes to one). States 3, 5, and 9 appear neither to be stuck, nor to exhibit the expected motion about a mean position of zero. It is therefore likely that the tether is stuck to the coverslip, both shortening the tether and shifting the equilibrium position. Interestingly, these transitions always occur during the unlooped state. Because the no-protein data does not show any such states, it appears likely that this adhesion (sticking) is protein-mediated.

### State clustering

In analogy with the simulated data, we now propose a model in which the looped and unlooped state clusters are described by the same model parameters, respectively. We constrain these parameters to be equal over the states in each cluster (as defined above). The resulting model (LLL-clustered) leads to an increase in the FIC, suggesting that in fact not all states in these proposed clusters can be described by the same parameters. Again, these observations reveal that the experimental true distribution is far more complex than the simulated model.

## DISCUSSION

In the previous section, we applied FIC to determine the optimal models for experimental TPM data by minimizing the estimated information loss. Simulated TPM data is discussed in the Supporting Material. The analysis of both simulated and experimental data demonstrated both the ability of the model selection approach to eliminate unnecessary parameters (in the context of the simulated data) while retaining necessary parameters (in the experimental context). The analysis provides clear statistical evidence for a complexity in experimental data which, to date, has been mostly overlooked. Our central focus is not on the data we have discussed in the article, but rather to demonstrate an analytical tool (change-point analysis with FIC model selection) that we believe will be widely applicable to biophysical and cell biology problems.

A number of competing methods have been used to analyze TPM data: half-amplitude thresholding (16–18),

hidden Markov models (19,20), and variational Bayes (21). Indeed, our work is not the first application of the change-point analysis to TPM data: in 2010, Manzo and Finzi (10) performed a beautiful analysis that harnessed some of the advantages of change-point analysis. Our analysis improves upon the published change-point analysis in three respects: 1) We improve the resolution of the analysis by analyzing more of the experimental information by approximating the underlying physics with a better microscopic model. 2) The improved model results in the statistical inference of more physically relevant model parameters: the diffusion constant and the relaxation time for each state identified by the analysis, as well as the level means that correspond to the tether location. 3) Finally, because our analysis is based on an information criterion, rather than explicit individual likelihood ratio tests, the analysis of the statistical significance of the results is dramatically simplified.

As described above (LOG Model), Manzo and Finzi (10) previously used a change-point analysis to analyze TPM data, approximating the process as Gaussian (rather than Ornstein-Uhlenbeck) with a global mean. Clearly, there are two very important shortcomings of analysis with the incorrect noise model: 1) As we demonstrated above, the determination of both the local diffusion constant (variance) and local mean position allows sticking event to be resolved and identified. 2) As most clearly demonstrated in the analysis of the simulated TPM data in the [Supporting Material](#), the failure to correctly model the correlations among bead positions (in an Ornstein-Uhlenbeck process) can lead to severe oversegmentation of the data. Therefore, the use of FIC and the correct Ornstein-Uhlenbeck noise model significantly improves the analysis.

But, it is important to note that even when the underlying physical model is not correct in detail, the analysis can still result in strong statistical inferences. For instance, if the TPM experiment really was well approximated by an Ornstein-Uhlenbeck process, the histogram for the individual states would be Gaussian. In fact, the probability distributions corresponding to individual states are clearly poorly approximated by Gaussian distributions. The relative stability of the method to nonideal data is an important quality because true experimental processes are generically much more complicated than the simulated distributions that are typically invoked to test algorithms (12). It is therefore natural to ask why the Gaussian process approximation described in the previous paragraph leads to significant information loss, while the difference in the modeled and observed distribution functions is benign. The key differentiator is the effective temporal duration of the model-violating fluctuations. The Gaussian process approximation failed because the bead relaxation time was long enough for the change-point algorithm to model the physics with additional states (in the Gaussian process model), whereas the temporal duration of the distribution-function-violating per-

turbations is much too short to result in oversegmentation. If the true distribution function for the TPM process had very long tails, there would be very long-lived model-violating fluctuations and the change-point algorithm (using the Ornstein-Uhlenbeck approximation) would lead to oversegmentation of the data. In this case, a more complicated analysis would be required.

The surprising feature of the TPM analysis was the diversity of states detected and the failure of these states to be clustered into a small number of statistically identical states (corresponding to looped and unlooped configurations). Had we designed a model based on our physical intuition, we might not have included this possibility. A strength of our approach is the low computational cost of our algorithm, which facilitated a less-biased approach whereby we considered a large number of candidate models. We expect the data from *in vivo* experiments to be less ideal still. Cells may switch between behaviors that are approximately discrete in nature, but in reality the system is transitioning between states that are all distinct and cells never truly transition back to an identical state. Change-point analysis is well suited to these problems because the algorithm does not use the trajectory history, except locally, when determining statistical support for a transition. This is not to say that building a quantitative model for the system does not require the clustering of states. On the contrary, we suggested such a clustering in order to interpret the TPM data. In the context of our analysis, we first studied the distribution of state parameters that resulted from the change-point analysis and then made a decision about how to cluster the states, which was informed both by the distribution of parameters and by our biophysical knowledge of the system. A large number of distinct states is probably generically justified for biological problems.

## Competing techniques

In short, change-point analysis using FIC model selection has many practical advantages over existing tools. As we have already discussed, our implementation of change-point analysis leads a significant reduction in information loss in the context of TPM analysis than the previous implementation proposed by Manzo and Finzi (10), and is much more generally applicable than previous approaches (e.g., Watkins and Yang (6) and Kalafut and Visscher (9)).

The Bayesian information criterion (BIC), which can be understood as the weak-prior limit of a Bayesian approach, has recently been used for a biophysical change-point application by Kalafut and Visscher (9). BIC is already known to be an asymptotic result that is applicable only at large  $N$  (22), but it is particularly poorly suited to the change-point problem because the BIC complexity is too small for small  $N$  and much too large for large  $N$ , and therefore it is difficult to recommend this approach under any circumstance. (See the [Supporting Material](#).)

Little, Jones, and co-workers (1,5,23,24) have recently introduced a number of convex methods closely related to change-point analysis. Although convexity is clearly a desirable property of an algorithm, the mathematical meaning of the convexified optimization is less clear. Furthermore, the regularization constant (the complexity) in these techniques is an adjustable parameter. Therefore these analyses are subject (in principle) to the value of an ad hoc regularization constant. In FIC, the complexity, although an approximation, is rigorously defined in terms of the bias of the estimator of the cross entropy, and is therefore not an adjustable parameter.

Hidden Markov models (HMM) provide a powerful approach to the analysis of systems that transition between states with unknown emission spectrums (e.g., Rabiner (11)). Like the change-point algorithm, a maximum likelihood approach to HMMs is also subject to the problem of overfitting, but a Bayesian approach is free from these shortcomings. For that reason, a significant number of authors have either undertaken a fully Bayesian HMM analysis (e.g., Johnson et al. (21), and references therein) or invoked Bayesian arguments implicitly by a maximum likelihood approach to HMM, coupled with BIC model selection (e.g., Greenfield et al. (25)). The Bayesian approach has a number of drawbacks: in general, Bayesian approaches to model selection have the disadvantage that they depend upon prior probability distributions for the model parameters (and models). Like the adjustable regularization constants for the convex methods, the Bayesian analysis is dependent, at least in principle, on the choice of prior probability distributions. We expect the fully Bayesian approach will not result in models that are optimally predictive, and in particular will result in underfitting for vague priors (C. H. LaMont and P. A. Wiggins, unpublished). In fact, the underfitting problem may be especially severe in the context of biophysical problems where, as we have demonstrated in the context of TPM, the assumption that the system returns to a state that is statistically identical to a previous state is flawed. Finally, even approximate Bayesian approaches, like variational Bayes, are computationally demanding.

## CONCLUSIONS

We have developed an information-based approach to change-point analysis, which is computationally efficient, applicable, tractable, and statistically principled. As illustrated by applications to both experimental and simulated data, the approach is widely applicable to many important problems in biophysics and cell biology. In analogy to AIC, FIC is an approximation for the unbiased estimator of information loss. The proposed change-point model selection criterion can be rigorously understood as minimizing expected information loss, in analogy to the use of AIC in other contexts. We expect that this proposed information-based approach to change-point analysis will prove attractive to in-

vestigators who wish to use a statistically principled approach free from ad hoc parameters or prior probability distributions.

## SUPPORTING MATERIAL

Supporting Materials and Methods, two figures, and two tables are available at [http://www.biophysj.org/biophysj/supplemental/S0006-3495\(15\)00552-4](http://www.biophysj.org/biophysj/supplemental/S0006-3495(15)00552-4).

## AUTHOR CONTRIBUTIONS

P.A.W. designed research, performed research, contributed analytic tools, analyzed data, and wrote the article.

## ACKNOWLEDGMENTS

The author thanks C. LaMont for teaching him about information-based techniques; K. Burnham, J. Wellner, L. Weihs, and M. Drton for advice and discussions; D. Dunlap and L. Finzi for experimental data; and M. Lindén and N. Kuwada for advice on the manuscript.

This work was supported by National Science Foundation Molecular and Cellular Biosciences grant No. 1243492.

## REFERENCES

1. Little, M. A., and N. S. Jones. 2011. Generalized methods and solvers for noise removal from piecewise constant signals. I. Background theory. *Proc. Math. Phys. Eng. Sci.* 467:3088–3114.
2. Page, E. S. 1955. A test for a change in a parameter occurring at an unknown point. *Biometrika.* 42:523–527.
3. Page, E. S. 1957. On problems in which a change in a parameter occurs at an unknown point. *Biometrika.* 44:248–252.
4. Chen, J., and A. K. Gupta. 2007. On change point detection and estimation. *Comm. Stat. Simul. Comput.* 30:665–697.
5. Little, M. A., and N. S. Jones. 2011. Generalized methods and solvers for noise removal from piecewise constant signals. II. New methods. *Proc. Math. Phys. Eng. Sci.* 467:3115–3140.
6. Watkins, L. P., and H. Yang. 2005. Detection of intensity change points in time-resolved single-molecule measurements. *J. Phys. Chem. B.* 109:617–628.
7. Montiel, D., H. Cang, and H. Yang. 2006. Quantitative characterization of changes in dynamical behavior for single-particle tracking studies. *J. Phys. Chem. B.* 110:19763–19770.
8. Kerssemakers, J. W. J., E. L. Munteanu, ..., M. Dogterom. 2006. Assembly dynamics of microtubules at molecular resolution. *Nature.* 442:709–712.
9. Kalafut, B., and K. Visscher. 2008. An objective, model-independent method for detection of non-uniform steps in noisy signals. *Comput. Phys. Commun.* 179:716–723.
10. Manzo, C., and L. Finzi. 2010. Quantitative analysis of DNA-looping kinetics from tethered particle motion experiments. *Methods Enzymol.* 475:199–220.
11. Rabiner, L. R. 1989. A tutorial on hidden Markov models and selected applications in speech recognition. *Proc. IEEE.* 77:257–284.
12. Burnham, K. P., and D. R. Anderson. 1998. *Model Selection and Multi-model Inference*, 2nd Ed. Springer, New York.
13. Akaike, H. 1973. Information theory and an extension of the maximum likelihood principle. *In* 2nd International Symposium of Information Theory. B. N. Petrov and F. Csaki, editors. Akademiai Kiado, Budapest, Hungary, pp. 267–281.



14. Watanabe, S. 2009. Algebraic Geometry and Statistical Learning Theory. Cambridge University Press, New York.
15. Finzi, L., and J. Gelles. 1995. Measurement of lactose repressor-mediated loop formation and breakdown in single DNA molecules. *Science*. 267:378–380.
16. Colquhoun, D., and B. Sigworth. 1983. Fitting and Statistical Analysis of Single-Channel Recording. Plenum Press, New York.
17. van den Broek, B., F. Vanzi, ..., G. J. L. Wuite. 2006. Real-time observation of DNA looping dynamics of type III restriction enzymes *NaeI* and *NarI*. *Nucleic Acids Res.* 34:167–174.
18. Vanzi, F., C. Broggio, ..., F. S. Pavone. 2006. *Lac* repressor hinge flexibility and DNA looping: single molecule kinetics by tethered particle motion. *Nucleic Acids Res.* 34:3409–3420.
19. Beausang, J. F., and P. C. Nelson. 2007. Diffusive hidden Markov model characterization of DNA looping dynamics in tethered particle experiments. *Phys. Biol.* 4:205–219.
20. Beausang, J. F., C. Zurla, ..., P. C. Nelson. 2007. DNA looping kinetics analyzed using diffusive hidden Markov model. *Biophys. J.* 92:L64–L66.
21. Johnson, S., J. W. van de Meent, ..., M. Lindén. 2014. Multiple Lac-mediated loops revealed by Bayesian statistics and tethered particle motion. *ArXiv14020894 Phys. Q-Bio*.
22. Kass, R. E., and A. E. Raftery. 1995. Bayes factors. *J. Am. Stat. Assoc.* 90:773–795.
23. Little, M. A., B. C. Steel, ..., N. S. Jones. 2011. Steps and bumps: precision extraction of discrete states of molecular machines. *Biophys. J.* 101:477–485.
24. Little, M. A., and N. S. Jones. 2013. Signal processing for molecular and cellular biological physics: an emerging field. *Philos. Trans. A Math. Phys. Eng. Sci.* 371:20110546.
25. Greenfeld, M., D. S. Pavlichin, ..., D. Herschlag. 2012. Single molecule analysis research tool (SMART): an integrated approach for analyzing single molecule data. *PLoS ONE*. 7:e30024.

# Supplement: An information-based approach to Change-Point Analysis with applications to biophysics and cell biology.

Paul A. Wiggins

*Departments of Physics, Bioengineering and Microbiology, University of Washington, Box 351560.  
3910 15th Avenue Northeast, Seattle, WA 98195, USA\**

## Contents

|                                                                                |    |
|--------------------------------------------------------------------------------|----|
| <b>I. Model Definitions</b>                                                    | 1  |
| A. State model probability distribution                                        | 1  |
| <b>II. Analytic results for MLE Parameters</b>                                 | 2  |
| A. Preliminaries                                                               | 2  |
| B. Evaluation by cumulative sum                                                | 2  |
| C. Level mean MLE                                                              | 3  |
| D. Level slope MLE                                                             | 3  |
| E. Coupling MLE                                                                | 4  |
| F. Information                                                                 | 5  |
| <b>III. Greedy binary-segmentation algorithm</b>                               | 5  |
| <b>IV. Statistical tests for change points</b>                                 | 5  |
| <b>V. Asymptotic scaling of the complexity for three Information Criteria.</b> | 6  |
| <b>VI. Application to simulated data</b>                                       | 7  |
| <b>References</b>                                                              | 10 |

## I. MODEL DEFINITIONS

### A. State model probability distribution

The noise model in a particular state is (i) Markovian, (ii) gaussian and (iii) Stationary. Markovian implies that the memory of the noise is only a single time step. Stationary implies that the parameters describing the noise are constant in any given state, although these parameters can clearly change due to state transitions. Gaussian refers to the distribution of the noise around the mean value. Together these conditions imply that the model for the probability distribution ( $q$ ) for observation  $\vec{x}_i$ , given  $\vec{x}_{i-1}$  takes the following form:

$$q(x_i|x_{i-1}; \boldsymbol{\theta}) = \left(\frac{k}{2\pi}\right)^{D/2} e^{-\frac{1}{2}\xi_i^2}, \quad (1)$$

$$\xi_i \equiv k^{1/2} (x_i - \bar{x}_i), \quad (2)$$

$$\bar{x}_i \equiv \varepsilon(x_{i-1} + \alpha) + (1 - \varepsilon)(\mu + \alpha\Delta t_i^*), \quad (3)$$

$$\Delta t_i^* \equiv t_i - t^*, \quad (4)$$

---

\*Electronic address: [pwiggins@uw.edu](mailto:pwiggins@uw.edu); URL: <http://mtshasta.phys.washington.edu/>

where  $D$  is the dimension of the observation  $\vec{x}$ ,  $\theta$  is the vector of model parameters and we have made the observation vector sign implicit for clarity. Clearly these equations can be recast as a discrete stochastic process:

$$x_i = \bar{x}_i + k^{-1/2}\xi_i, \quad (5)$$

$$\xi_i \sim \mathcal{N}_D(0, \mathbb{1}_D), \quad (6)$$

where  $\xi_i$  are i.i.d. normally distributed random variables with variance one per dimension  $D$ . The connection between these discrete-time parameters and the underlying physical parameters used to describe the continuous-time process are discussed here [1].

## II. ANALYTIC RESULTS FOR MLE PARAMETERS

### A. Preliminaries

In this section we will write the algebraic expressions for the Maximum Likelihood Estimator (MLE) model parameters  $\hat{\theta}$  for a segment of the observations  $X_I$ . For the sake of brevity, we will drop the subscript  $I$  which will be implied (unless otherwise noted). Furthermore we shall number the indices starting at  $i = 0$  for the boundary variable and ending at  $N$ , the number of variables in the segment. These results are derived in detail elsewhere [1].

The model probability density is

$$q(\vec{x}_i|\vec{x}_{i-1}; \theta) = \left(\frac{k}{2\pi}\right)^{D/2} \exp\left[-\frac{k}{2}(\Delta\vec{x}_i - \varepsilon\Delta\vec{x}_{i-1})^2\right], \quad (7)$$

$$\Delta\vec{x}_i \equiv \vec{x}_i - \vec{\mu} - \vec{\alpha}\Delta t_i^*, \quad (8)$$

$$\Delta t_i^* \equiv t_i - t^*(\varepsilon), \quad (9)$$

where  $\theta$  is the vector of model parameters:

$$\theta \equiv (k, \varepsilon, \vec{\mu}, \vec{\alpha}). \quad (10)$$

The information for the  $N$  observations is

$$h(\theta|X) = \frac{ND}{2} \log \frac{2\pi}{k} + \frac{kV(\theta|X)}{2}, \quad (11)$$

where  $V$  the summed variance to be defined below.

### B. Evaluation by cumulative sum

For computational purposes, it is convenient to define quantities in terms of cumulative sums. These sums can be evaluated when the minimization is initiated and used throughout the calculation without the need for repeated

evaluation throughout the minimization process. We define the following cumulative sums:

$$\vec{X}_j \equiv \sum_{i=0}^j \vec{x}_i, \quad (12)$$

$$\vec{X}_{jk} \equiv \sum_{i=k}^j \vec{x}_i = \vec{X}_j - \vec{X}_{k-1}, \quad (13)$$

$$\vec{X}_{jk}^{(\varepsilon)} \equiv \vec{x}_j - \vec{x}_{k-1}, \quad (14)$$

$$C_j^{(0)} \equiv \sum_{i=0}^j \vec{x}_i \cdot \vec{x}_i, \quad (15)$$

$$C_{jk}^{(0)} \equiv \sum_{i=k}^j \vec{x}_i \cdot \vec{x}_i = C_j^{(0)} - C_{k-1}^{(0)}, \quad (16)$$

$$C_j^{(1)} \equiv \sum_{i=1}^j \vec{x}_i \cdot \vec{x}_{i-1}, \quad (17)$$

$$C_{jk}^{(1)} \equiv \sum_{i=k}^j \vec{x}_i \cdot \vec{x}_{i-1} = C_j^{(1)} - C_{k-1}^{(1)}, \quad (18)$$

$$\vec{P}_j^{(0)} \equiv \sum_{i=0}^j t_i \vec{x}_i, \quad (19)$$

$$\vec{P}_{jk}^{(0)} \equiv \sum_{i=k}^j t_i \vec{x}_i = \vec{P}_j^{(0)} - \vec{P}_{k-1}^{(0)} \quad (20)$$

$$\vec{P}_{jk} \equiv \vec{P}_{jk}^{(0)} - \bar{t}_{jk} \vec{X}_{jk}, \quad (21)$$

$$\vec{P}_{jk}^{(\varepsilon)} \equiv \frac{1}{2}N(\vec{x}_j + \vec{x}_{k-1}) - \frac{1}{2}(\vec{x}_j - \vec{x}_{k-1}) - \vec{X}_{j-1,k-1}. \quad (22)$$

Note that each of these sums depends only on the observations (random variables  $X$ ).

### C. Level mean MLE

It is convenient to introduce the effective stiffnesses for the level mean:

$$k_\mu \equiv N, \quad (23)$$

and the factors

$$A^{(\mu)} = (1 - \varepsilon)^2 k_\mu, \quad (24)$$

$$\vec{B}^{(\mu)} = (1 - \varepsilon)^2 \left( \vec{X}_{jk} + \frac{\varepsilon}{1 - \varepsilon} \vec{X}_{jk}^{(\varepsilon)} \right), \quad (25)$$

in terms of which, the MLE level mean  $\hat{\mu}$  is:

$$\hat{\mu}(\varepsilon; X) = \frac{\vec{B}^{(\mu)}(X)}{A^{(\mu)}(X)}. \quad (26)$$

Note that the MLE level mean depends on  $\varepsilon$ .

### D. Level slope MLE

It is convenient to introduce the effective stiffnesses for the level slope:

$$k_\alpha \equiv \frac{N(N-1)(N+1)}{12}, \quad (27)$$

and the factors

$$A^{(\alpha)} \equiv (1 - \varepsilon)^2 k_\alpha \quad (28)$$

$$\vec{B}^{(\alpha)} \equiv (1 - \varepsilon)^2 \left( \vec{P}_{jk} + \frac{\varepsilon}{1 - \varepsilon} \vec{P}_{jk}^{(\varepsilon)} \right), \quad (29)$$

in terms of which, the MLE level slope  $\hat{\alpha}$  is:

$$\hat{\alpha}(\varepsilon; X) = \frac{\vec{B}^{(\alpha)}}{A^{(\alpha)}}. \quad (30)$$

Note that the MLE level slope depends on  $\varepsilon$ .

### E. Coupling MLE

We now substitute the MLE level mean and slope back into the summed variance:

$$\begin{aligned} V(\vec{\mu}, \vec{\alpha}, \varepsilon; X) &= C_{jk}^{(0)} - 2\varepsilon C_{jk}^{(1)} + \varepsilon^2 C_{j-1, k-1}^{(0)} \dots \\ &+ (1 - \varepsilon)^2 k_\mu [ (\vec{\mu} - \hat{\mu})^2 - \hat{\mu}^2 ] \dots \\ &+ (1 - \varepsilon)^2 k_\alpha [ (\vec{\alpha} - \hat{\alpha})^2 - \hat{\alpha}^2 ], \end{aligned} \quad (31)$$

which is an expression for arbitrary level mean and slope but written more concisely in terms  $\hat{\mu}$  and  $\hat{\alpha}$ .

Since  $\hat{\mu}$  and  $\hat{\alpha}$  depend implicitly on  $\varepsilon$ , we need to consider four possible cases. For both  $\alpha$  and  $\mu$  we consider the case where they are either set to an external value or they are set to the respective MLE value. Again, we now make the following convenient definitions analogous to those made for the level mean and slope:

$$A^{(\varepsilon)} \equiv C_{j-1, k-1}^{(0)} - R_\mu(\vec{\mu}) - R_\alpha(\vec{\alpha}) \quad (32)$$

$$B^{(\varepsilon)} \equiv C_{jk}^{(1)} - Q_\mu(\vec{\mu}) - Q_\alpha(\vec{\alpha}) \quad (33)$$

in terms of which, the MLE coupling  $\hat{\varepsilon}$  is:

$$\hat{\varepsilon}(\vec{\mu}, \vec{\alpha}; X) = \frac{B^{(\varepsilon)}}{A^{(\varepsilon)}}. \quad (34)$$

The  $Q$ s and  $R$ s are defined:

$$Q_\mu(\vec{\mu}) = \begin{cases} 0, & \vec{\mu} = 0 \\ k_\mu^{-1} \vec{X}_{jk} \cdot (\vec{X}_{jk} - \vec{X}_{jk}^\varepsilon), & \vec{\mu} = \hat{\mu} \\ -k_\mu \vec{\mu}^2 + 2\vec{\mu} \cdot (\vec{X}_{jk} - \frac{1}{2} \vec{X}_{jk}^\varepsilon), & \text{otherwise} \end{cases} \quad (35)$$

$$R_\mu(\vec{\mu}) = \begin{cases} 0, & \vec{\mu} = 0 \\ k_\mu^{-1} (\vec{X}_{jk} - \vec{X}_{jk}^\varepsilon)^2, & \vec{\mu} = \hat{\mu} \\ -k_\mu \vec{\mu}^2 + 2\vec{\mu} \cdot (\vec{X}_{jk} - \vec{X}_{jk}^\varepsilon), & \text{otherwise} \end{cases} \quad (36)$$

and the following relations for the level slopes:

$$Q_\alpha(\vec{\alpha}) = \begin{cases} 0, & \vec{\alpha} = 0 \\ k_\alpha^{-1} \vec{P}_{jk} \cdot (\vec{P}_{jk} - \vec{P}_{jk}^\varepsilon), & \vec{\alpha} = \hat{\alpha} \\ -k_\alpha \vec{\alpha}^2 + 2\vec{\alpha} \cdot (\vec{P}_{jk} - \frac{1}{2} \vec{P}_{jk}^\varepsilon), & \text{otherwise} \end{cases} \quad (37)$$

$$R_\alpha(\vec{\alpha}) = \begin{cases} 0, & \vec{\alpha} = 0 \\ k_\alpha^{-1} (\vec{P}_{jk} - \vec{P}_{jk}^\varepsilon)^2, & \vec{\alpha} = \hat{\alpha} \\ -k_\alpha \vec{\alpha}^2 + 2\vec{\alpha} \cdot (\vec{P}_{jk} - \vec{P}_{jk}^\varepsilon), & \text{otherwise} \end{cases} \quad (38)$$

In combination, these results lead to algebraic equations that are uncoupled. For instance, if the level slope is set to zero by hand and  $\mu$  and  $\varepsilon$  are both chosen to be their respective MLE values, we first compute  $\hat{\varepsilon}$ , then using  $\hat{\varepsilon}$ , we compute  $\hat{\mu}$ .

## F. Information

After the summed variance has been computed it is straightforward to compute the information. The MLE stiffness is

$$\hat{k}(\vec{\mu}, \vec{\alpha}, \varepsilon; X) = \frac{ND}{V(\vec{\mu}, \vec{\alpha}, \varepsilon; X)}, \quad (39)$$

where  $D$  is the dimension of the space of the observations  $\vec{x}_i$ . In terms of the MLE stiffness  $k$ , the information can be written:

$$h(\theta|X) = \frac{ND}{2} \left[ \log \frac{2\pi}{k} + \frac{k}{\hat{k}(\vec{\mu}, \vec{\alpha}, \varepsilon; X)} \right], \quad (40)$$

which is a general and exact expression for the information for any parameter set  $\theta$  that can be computed rapidly and algebraically without the need for solving any coupled or transcendental equations.

## III. GREEDY BINARY-SEGMENTATION ALGORITHM

In this section we introduce an algorithm for selecting the change-point indices  $i \equiv \{i_I\}_{I=1..n}$ . This is a nontrivial problem since not only are the change-point indices unknown, but even the number of transitions ( $n$ ) is unknown. The algorithm described here is called the Binary Segmentation Change-Point Algorithm and has been the subject of extensive study (e.g see the references in [2]). The Change-Point Algorithm is at its heart a data segmentation algorithm. The sequence of the observations is always maintained, but the data is divided into partitions, as specified by the change-points  $i \equiv \{i_I\}_{I=1..n}$ . Every binary segmentation is *greedy*: i.e. we choose the change point that minimizes the information loss in that given step, without any guarantee that this is the optimum choice over multiple segmentations. The family of models generated by successive rounds of segmentation are said to be *nested* since successive changes points are added without altering the time indices of existing change points. Therefore, the previous model is always a special case of the new model. The binary segmentation process is shown schematically in Figure 1. In each step, after the optimum index for segmentation is identified, we statistically test the change in information loss (due to segmentation) to determine whether the new state is statistically supported. The algorithm is written explicitly in Table I in the main text.

In some situations the Change-Point Algorithm can suffer from non-convexity: Any possible segmentation leads to an increase in the unbiased estimator of information loss, but subsequent segmentation operations lead to reductions in the unbiased estimator of information loss. To avoid this problem, we typically segment the data using a complexity term half the true complexity. After the segmentation processes has been terminated, we reset the complexity term to its true value and merge neighboring regions using a greedy algorithm, choosing there merger that leads to the largest decrease in the unbiased estimator of information loss. The algorithm is written explicitly in Table I.

## IV. STATISTICAL TESTS FOR CHANGE POINTS

There are two principle non-Bayesian classes of tests used to evaluate the existence of a change point<sup>1</sup>. These are (i) the Frequentist *Likelihood-Ratio Procedure Test* (LPT) and (ii) the *Informational-Based* approach. Chen and Gupta have compiled a summary of the literature which gives an extensive list of examples of each procedure as well as others [2]. The LPT test leverages detailed knowledge of a test statistic that has been specifically derived for a particular model. In an LPT test, the existence of a change point is tested against the null hypothesis that there is no change in a specified interval. A confidence level must be chosen by the investigator to test the null hypothesis. In some case there seems to be fairly general agreement about the correct statistic. For instance, to test for a level mean change for 1D observations  $x_i$  that are assumed to have equal and known variance, the  $U$  test statistic is used [2]. In the case of the rather general model that we have proposed, there are no existing test statistics to the author's knowledge. We therefore propose to take the information-based approach.

<sup>1</sup> We use the word *test* in an informal sense here since model selection criterion are not rigorously considered a statistical test.

### Greedy Merge Algorithm

1. Merge state of model  $\hat{\mathcal{M}}(i)$ :

(a) Compute the entropy change that results from all possible state mergers:

$$\Delta h_I \leftarrow \hat{h}(i|X) - \hat{h}(\{\dots, j', \dots\}|X), \quad (41)$$

(b) Find the maximum entropy change  $\Delta h_I$ , and the corresponding index  $I_{\max}$ .

(c) If the entropy change plus the nesting complexity is less than zero:

$$\Delta h_I + \ell_- > 0 \quad (42)$$

**then** then remove change-point  $i_I$

i. Add the new change-point to the change-point vector.

$$i \leftarrow \{\dots, j', \dots\} \quad (43)$$

ii. Merge state of model  $\hat{\mathcal{M}}(i)$ .

(d) **Else** terminate the merger process.

TABLE I: The Greedy-Merge Algorithm.

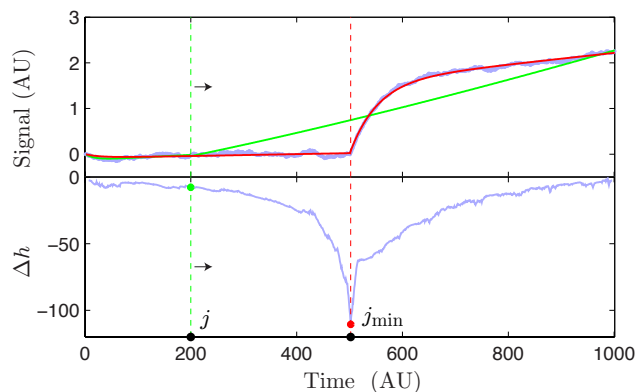

FIG. 1: **Schematic of binary segmentation.** To segment a partition, the information change due to placing a new boundary at each time point is computed. (The dashed red and green lines represent partition positions.) At each boundary position, a maximum likelihood fit is performed to the data (top panel, blue dots) in each of the two new partitions, resulting in the solid curves (top panel, red and green for the respective boundary positions). For each boundary position, an information change is computed (bottom panel). The partition is placed at the position that minimizes the information change (red dashed line), which maximizes the likelihood.

At the time Chen and Gupta wrote their review, the Bayesian Information Criterion (BIC) was essentially the only viable information-based approach. We recently proposed a new information criterion: the Frequentist Information Criterion (FIC). Note that we have proposed that this information-based approach and the LPT approach are essentially equivalent [1, 3].

### V. ASYMPTOTIC SCALING OF THE COMPLEXITY FOR THREE INFORMATION CRITERIA.

We will not discuss the computation of the complexity here due to space limitations. A detailed description is given in Ref. [1].

The resolution of the Change-Point Algorithm is determined by the size of the complexity  $\mathcal{K}$  in the information criterion. We now present a brief comparison of the FIC approximation for the complexity with two competing information criteria: the Akaike Information Criterion (AIC) and the Bayesian Information Criterion<sup>2</sup> (BIC). Consider the change in the information ( $\Delta h$ ) on the addition of a new state, parameterized by  $d$  local parameters describing the noise model. The additional state is considered predictive if it is larger than the nesting complexity, which is equal to the difference between the post and pre nesting complexities:

$$-\Delta h > k_- \equiv \mathcal{K}_{n+1} - \mathcal{K}_n. \quad (44)$$

The asymptotic values for the nesting complexities for the three information criteria are:

$$-\Delta h > k_- = \begin{cases} d, & \text{AIC (pathological)} \\ 2 \log \log N + \mathcal{O}(\log \log \log N), & \text{FIC} \\ \frac{1}{2} d \log N, & \text{BIC} \end{cases}, \quad (45)$$

where we have assumed that the number of observations  $N$  is large and we have only preserved the leading order contribution to the complexity in the case of FIC. Note that the AIC complexity is known to be too small to terminate the segmentation process due to presence of unidentifiable parameters. On-the-other-hand, the Bayesian approach (as approximated by BIC) is known empirically to prevent over-fitting, at least in the asymptotic limit (large  $N$ , e.g. [5]). But, is the BIC complexity efficient in the sense that it balances the competing mechanisms of information loss of over and under-fitting to optimize model predictivity? Since FIC is defined to optimize the predictivity, BIC is only optimal when it is equal to FIC. In the asymptotic limit, the FIC complexity is expected to be smaller than the BIC complexity in two respects: In FIC (i) the leading order contribution to the complexity is independent of dimension of the noise model  $d$  and (ii)  $\log \log N$  clearly increases more slowly with  $N$  than  $\log N$ . Therefore in the large  $N$  limit, the use BIC leads to under-fitting. We have also demonstrated that BIC also leads to overfitting at intermediate to small  $N$  values where its the justification for its applicability is somewhat ambiguous in any case [1].

Note that we *do not* recommend the direct application of the asymptotic FIC complexity since the complexity converges to the  $2 \log \log N$  limit very slowly. We therefore advocate a Monte Carlo computation of the complexity. Since the complexity is clearly very weakly dependent on  $N$ , we advocate the generation of a lookup-table from which complexity values can be interpolated on demand. See Ref. [1].

## VI. APPLICATION TO SIMULATED DATA

We analyze simulated TPM data to test the performance of the Frequentist Information Criterion (FIC) and the Change-Point Algorithm under ideal circumstances.

**Data simulation:** The microscopic physics is a discrete Ornstein-Uhlenbeck Process which obeys Equation 6 with  $k^{-1} = 1200 \text{ nm}^{-2}$ ,  $\bar{\mu} = 0 \text{ nm}$ , and  $\varepsilon$  alternating between the values of 0.92 and 0.70 by state. Naïvely this would appear to be a fairly good model for the TPM experiment: (i) Repressor-DNA binding induces DNA looping, reducing the effective tether length without changing the mean spatial position of the bead; therefore we expect the mean position  $\bar{\mu}$  to be equal for all states. (ii) Similarly, diffusion is dominated by the movement of the bead; therefore we would expect the diffusion constant to be equal for all states<sup>3</sup>. The diffusion constant is parameterized by the stiffness  $k$ . (iii) Repressor binding shortens the effective DNA tether length by looping the tether. The DNA tether can be approximated as a linear spring with a tether-length-dependent spring constant. This spring constant is parameterized by the nearest-neighbor coupling  $\varepsilon$  and therefore we expect  $\varepsilon$  to be state dependent. The explicit mapping between the discrete-time stochastic parameters and the physical parameters is derived in Ref. [1]. In the interest of clarity we shall discuss results only in terms of the discrete parameters fit in the model, rather than the extrapolated physical parameters. We simulated a 2D trajectory with  $5 \times 10^4$  frames and four transitions corresponding to five states. The simulated data are shown in Figure 2.

**Analysis of simulated data.** As a first step in the data analysis, we need to determine which family of nested change-point models to analyze. We set the level slope  $\alpha = 0$  by hand. Now, we need to determine whether to fit the remaining parameters ( $k$ ,  $\varepsilon$  and  $\mu$ ) as local (L) or global (G) parameters. We perform Change-Point Analysis for each

<sup>2</sup> Notes that despite its name, BIC is not an information criterion in the strict sense that it can be understood as an estimator of the cross entropy. See e.g. [4].

<sup>3</sup> We fluid coupling to the coverslip and the change in the effective diffusion constant as a result of the finite frame rate.



| Model $\mathcal{M}$<br>( $k, \varepsilon, \mu$ ) | Information Criterion<br>$\Delta\text{FIC}$ (nats) | Number of States<br>$n$ | Parameters<br>per State $d$ |
|--------------------------------------------------|----------------------------------------------------|-------------------------|-----------------------------|
| L O G                                            | 67,158                                             | 111                     | 1                           |
| G G L                                            | 1,584                                              | 1                       | 2                           |
| L G L                                            | 1,561                                              | 4                       | 3                           |
| L G G                                            | 1,559                                              | 5                       | 1                           |
| L L L                                            | 10                                                 | 5                       | 5                           |
| G L L                                            | 8                                                  | 5                       | 3                           |
| L L G                                            | 4                                                  | 5                       | 2                           |
| G L G                                            | 2                                                  | 5                       | 1                           |
| <b>G L G Clustered</b>                           | <b>0</b>                                           | <b>5</b>                | <b>1</b>                    |

TABLE II: **Model selection for simulated TPM data.** We considered eight families of nested models where the parameters  $k$ ,  $\varepsilon$  and  $\mu$  are either optimized locally ( $L$ , a distinct value for each state  $I$ ) or globally ( $G$ , identical values for all states). For each model family, the information criterion FIC is computed for the optimal change-point model (which minimizes FIC). The overall optimum model is chosen by minimizing FIC with respect to these minimal family models. In this case, the GLG model results in the minimum FIC, which corresponds to global ( $G$ ) values for both  $\mu$  and  $k$  and local state-specific values ( $L$ ) for  $\varepsilon$ . A further reduction in FIC is achieved by clustering the states into two cluster corresponding to looped and unlooped states with common model parameters. We have grouped the models into three categories: unacceptable (top), acceptable (middle) and optimal (Bottom). All models except those with global values for  $\varepsilon$  lead to acceptable values for  $\Delta\text{FIC}$ . Model “GLG Cluster” results in the smallest information loss since it contains the minimum number of parameters required to describe the data.

possibility: In each case, we minimize FIC for the family of nested models to find the optimal model in the model family. Once the family-optimum model has been determined, we record the FIC value for this model which is the unbiased estimate of information loss. We also consider a model that is constrained to be a gaussian process ( $\varepsilon = 0$ ) rather than Ornstein-Uhlenbeck with a global mean (model L0G) since this was essentially the model employed by Finzi and coworkers [6]. A summary of the analysis of the simulated data is shown in Table II. In practice, the FIC values have a large constant offset and therefore only the FIC values relative to the minimum FIC value ( $\Delta\text{FIC}$ ) are shown in the table. The model with the lowest FIC is the model with the strongest statistical support. The relative difference between the FIC values for each model encodes the relative strength of the statistical support for the model. Four out of the initial eight models (black text) result in small information loss and are therefore expected to be close approximations to the truth. (We shall discuss the ninth, clustered model shortly.) As one might expect, the only models which fail are those in which  $\varepsilon$  is made global (gray text). Remember, this was the only parameter that changes between states in the simulated data and therefore we expect the analysis to fail when all states are constrained to take the same parameter value. By far the worst model is L0G (similar to that employed by Finzi and coworkers). It drastically overestimates the number of states, resulting in enormous information loss. As explained in the previous section, the correlations between successive observations in an Ornstein-Uhlenbeck Process are not accounted for by the microscopic model when  $\varepsilon = 0$ ; therefore these correlations lead the Change-Point Algorithm to call states to explain these correlations. It should be noted that this is only a problem for states with  $\varepsilon$  close to one. In the experimental data from the Dunlap Lab discussed in the next section,  $\varepsilon$  is small enough to avoid this artifact. The remaining four models (black) are all acceptable, but the optimal model is the model where only  $\varepsilon$  is local: GLG (black). Remember that from the perspective of Maximum-Likelihood, more model parameters always results in a better fit and therefore choosing  $k$  and  $\mu$  as global parameters is a non-trivial success.

We now turn our attention to a detailed look at the LLL model where all parameters are local. Although this is not the optimal model, the analysis of this model will be more pertinent to the analysis of the experimental data. The locations of the change points in both the GLG and LLL models were identical and the smaller GLG FIC value is due only to the reduction in information loss due to over-parameterization of the LLL model.

Since we are analyzing simulated data, we can check the fit model against the known true model. Every simulated data set generated (10) produced five states with accurately positioned change-points. The simulated data and the LLL model are shown in Figure 2. An experimental schematic is shown in Panel A, superimposed on the  $y$ -position trace of the bead. In the background of Panel A, the simulated trace of the  $y$ -position is shown, colored by state as identified by the Change-Point Algorithm with the state number plotted above the trace. To be clear, both  $x$  and  $y$  positions of the bead are simulated and analyzed but only the  $y$  positions are shown in the figure. The true change-point positions are known and are shown with dashed black lines. The determination of the change-points is extremely accurate, as is clearly observed in the zoomed region of the trace, shown as an inset in Panel A. The median distance between the estimated change point and the true change point was 10 frames in our simulations and analysis. This precision depends on the model parameters simulated. The qualitative features of Ornstein-Uhlenbeck Process are also clearly illustrated by the zoomed trace. On short times, the bead diffuses but on longer times the bead shows an autoregressive motion towards the mean position.  $\varepsilon$  parameterizes the lifetime of these

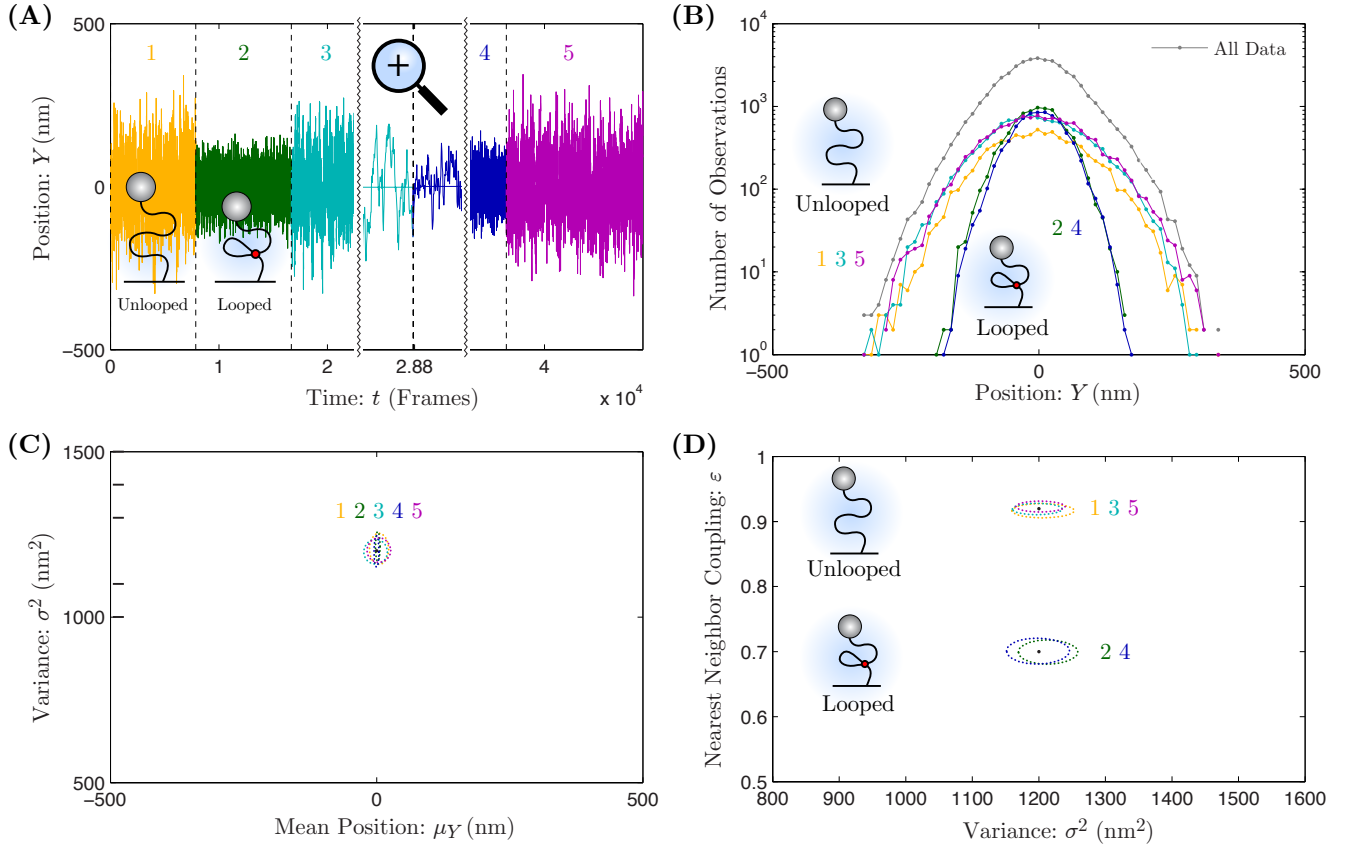

**FIG. 2: Analysis of simulated TPM data. Panel A: Experimental schematic and y-position trace.** The  $y$ -position trace is shown for  $5 \times 10^4$  frames. Two classes of states are clearly identifiable: Unlooped and looped states with larger and smaller variance in bead position (respectively) resulting from changes in the effective tether length. Change-point analysis was employed to identify the system state and the traces are colored by state with the state number plotted above the trace. The true change points are shown as dashed black lines. We have shown a high-time-resolution inset in the trace for the transition between states 3 and 4 to show the accuracy of the change-point detection. **Panel B: Histogram of y-position by state.** The histogram of all  $y$ -positions and positions by state are shown. Two types of states are observed: an unlooped state (1, 3, 5) and a looped state (2, 4). **Panels C & D: State model parameters.** Dotted curves represent 95% confidence regions for parameter values by state. Black points represent true parameter values. The clusters corresponding to the looped and unlooped states are clear in the plot of stiffness  $k = \sigma^{-2}$  versus nearest-neighbor coupling  $\varepsilon$ . Since all states have the same values of  $\mu$  and  $k$ , only a single cluster is observed in the mean versus variance plot.

fluctuations. In Panel B, the histogram of bead  $y$ -position is shown for each state. Unlike the experimental data, the probability distributions are gaussian. In Panels C and D the state model parameters are shown by state. The dotted curves represent the 95% confidence region for each, colored by state. As the reader can see, the model parameters are correctly estimated by the analysis.

**State clustering.** The tight clustering of states  $\{1, 3, 5\}$  and  $\{2, 4\}$  in panels C and D immediately suggest that these states are described by identical parameters. Again, it is straight forward to investigate such a model: We start with the optimal GLG model and constrain all parameters to be equal for the two state clusters respectively<sup>4</sup>. The resulting FIC value for the model “GLG Clustered” is smaller than the GLG model and therefore optimal. Again, this should come as no surprise since this was precisely the model that was simulated.

In summary, we have optimized families of nested models with different numbers of state parameters using the Change-Point Algorithm and the Frequentist Information Criterion (FIC). The resulting optimal models were then compared using the FIC information criterion to choose between different families of models. This technique enabled

<sup>4</sup> It should be note that automated clustering poses problem similar to the Change-Point Algorithm. Many techniques have been proposed. E.g. see references in [7].

us to identify the optimal model with the same number of model parameters as the true model that was simulated. The optimal model identified change points (state transitions) that were essentially identical to the simulated model and the resulting estimated parameters closely matched those simulated. Although this result is satisfying, it is not necessarily indicative of success in the context of experimental data. It is important to note that the existence of a true model with a finite number of model parameters and furthermore a true model exactly equal to one of the candidate models is an unrealistic convenience of the analysis of simulated data [4].

- 
- [1] Wiggins, P. A., 2015. The development of an information criterion for Change-Point Analysis with applications to biophysics and cell biology. *Submitted to PRE*. .
  - [2] Chen, J., and A. K. Gupta, 2007. On change point detection and estimation. *Communications in Statistics–Simulation and Computation* 30:665–697.
  - [3] Wiggins, P. A., 2015. The Frequentist Information Criterion (FIC): The unification of information-based and frequentist inference. *In preparation*. .
  - [4] Burnham, K. P., and D. R. Anderson, 1998. Model selection and multimodel inference. Springer-Verlag New York, Inc., 2nd. edition.
  - [5] Kalafut, B., and K. Visscher, 2008. An objective, model-independent method for detection of non-uniform steps in noisy signals. *Computer Physics Communications* 179:716–23.
  - [6] Manzo, C., and L. Finzi, 2010. Quantitative analysis of DNA-looping kinetics from tethered particle motion experiments. *Methods Enzymol* 475:199–220.
  - [7] Watkins, L. P., and H. Yang, 2005. Detection of intensity change points in time-resolved single-molecule measurements. *J Phys Chem B* 109:617–28.
